# Supplementary material for: Genome-Wide Association Study Adjusted for Occupational and Environmental Factors for Bladder Cancer Susceptibility
Source: MDPI journal article supplement (doi:10.3390/genes13030448), 2022-02-28

Supplementary Figure S3: Regional plots of the WNT2B region. Added industrial/occupational factors were 1 variable with 20 levels for industrial classification divisions for the upper panel, industrial classification divisions G, L, and S for the middle, and selected industrial classification major groups in divisions D, E, and H for the lower.

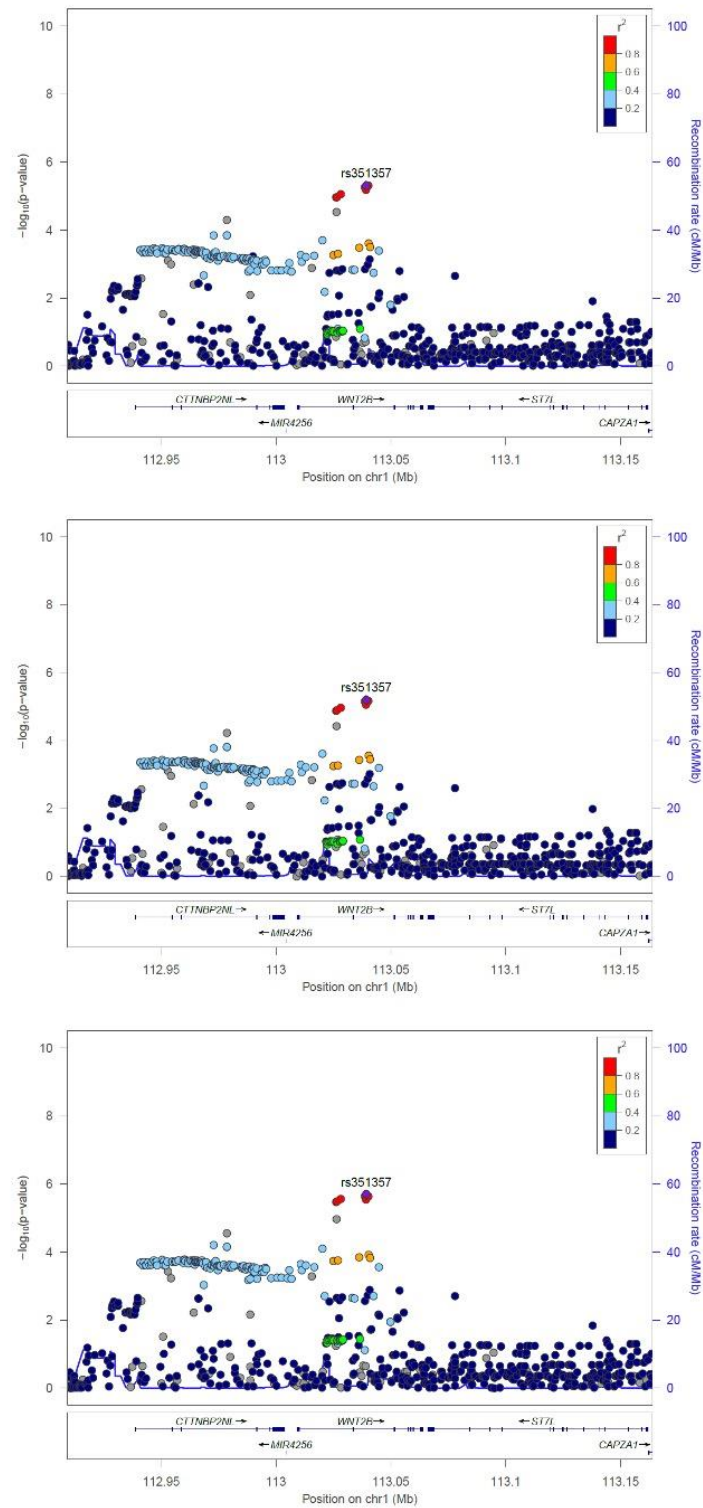

Supplement: s1 [file s1]
