# Supplementary material for: Genome-Wide Association Study Adjusted for Occupational and Environmental Factors for Bladder Cancer Susceptibility
Source: MDPI journal article supplement (doi:10.3390/genes13030448), 2022-02-28
Supplement: s1 [file s1]

Supplementary Table S7: The number of SNPs that was able to be imputed was 47,109,297. Of the 47,109,297 SNPs, 11,175,945 with an R-square value greater than 0.3 were used in the GWAS.

|                                            |            |            |
|--------------------------------------------|------------|------------|
| Number of Imputed SNPs                     | 47,109,297 |            |
|                                            | Extracted  | Excluded   |
| Number of SNPs satisfied $R_{sq} \geq 0.3$ | 11,175,945 | 35,933,352 |
| Number of SNPs for analysis                | 11,175,945 | 0          |
