# Supplementary material for: Genome-Wide Association Study Adjusted for Occupational and Environmental Factors for Bladder Cancer Susceptibility
Source: MDPI journal article supplement (doi:10.3390/genes13030448), 2022-02-28
Supplement: s1 [file s1]

Supplementary Table S3: Japan Standard Occupational Classification (Rev. 5th, December 2009),  
Major groups

| Major groups |                                                    |
|--------------|----------------------------------------------------|
| A            | Administrative and managerial workers              |
| B            | Professional and engineering workers               |
| C            | Clerical workers                                   |
| D            | Sales workers                                      |
| E            | Service workers                                    |
| F            | Security workers                                   |
| G            | Agriculture, forestry and fishery workers          |
| H            | Manufacturing process workers                      |
| I            | Transport and machine operation workers            |
| J            | Construction and mining workers                    |
| K            | Carrying, cleaning, packaging, and related workers |
| L            | Workers not classified by occupation               |
