# Supplementary material for: Genome-Wide Association Study Adjusted for Occupational and Environmental Factors for Bladder Cancer Susceptibility
Source: MDPI journal article supplement (doi:10.3390/genes13030448), 2022-02-28
Supplement: s1 [file s1]

Supplementary Table S4: Incidence of malignant tumors other than urothelial cancer

|                         | Prostate ca<br>(%) | Renal<br>cell ca | Testis<br>tumor | Colorectal<br>ca | Gastric<br>ca | Lung<br>ca | Laryngo-<br>pharyngeal ca | Hematological<br>malignancy | Mammary<br>ca | Liver<br>ca | Other<br>malignancy | All  |
|-------------------------|--------------------|------------------|-----------------|------------------|---------------|------------|---------------------------|-----------------------------|---------------|-------------|---------------------|------|
| BladderCa_male (n=302)  | 2.3                | 0.3              | 0.0             | 3.6              | 2.6           | 1.7        | 0.7                       | 0.7                         | 0.0           | 1.0         | 1.0                 | 13.9 |
| Control_male (n=395)    | 46.6               | 11.1             | 1.3             | 3.5              | 3.8           | 2.3        | 1.0                       | 1.5                         | 0.0           | 0.3         | 0.8                 | 72.2 |
| BladderCa_female (n=50) | 0.0                | 2.0              | 0.0             | 4.0              | 2.0           | 0.0        | 0.0                       | 0.0                         | 8.0           | 0.0         | 2.0                 | 18.0 |
| Control_female (n=39)   | 0.0                | 43.6             | 0.0             | 2.6              | 2.6           | 2.6        | 0.0                       | 0.0                         | 5.1           | 0.0         | 2.6                 | 59.0 |
