# Supplementary material for: Genome-Wide Association Study Adjusted for Occupational and Environmental Factors for Bladder Cancer Susceptibility
Source: MDPI journal article supplement (doi:10.3390/genes13030448), 2022-02-28

Supplementary Figure S2: Regional plots of LINC00922 CDH5 (Upper) and LINC00473 PDE10A (Lower) regions. Added industrial/occupational factors were industrial classification divisions G and S for the upper panel and Zaitzu classifications for the lower.

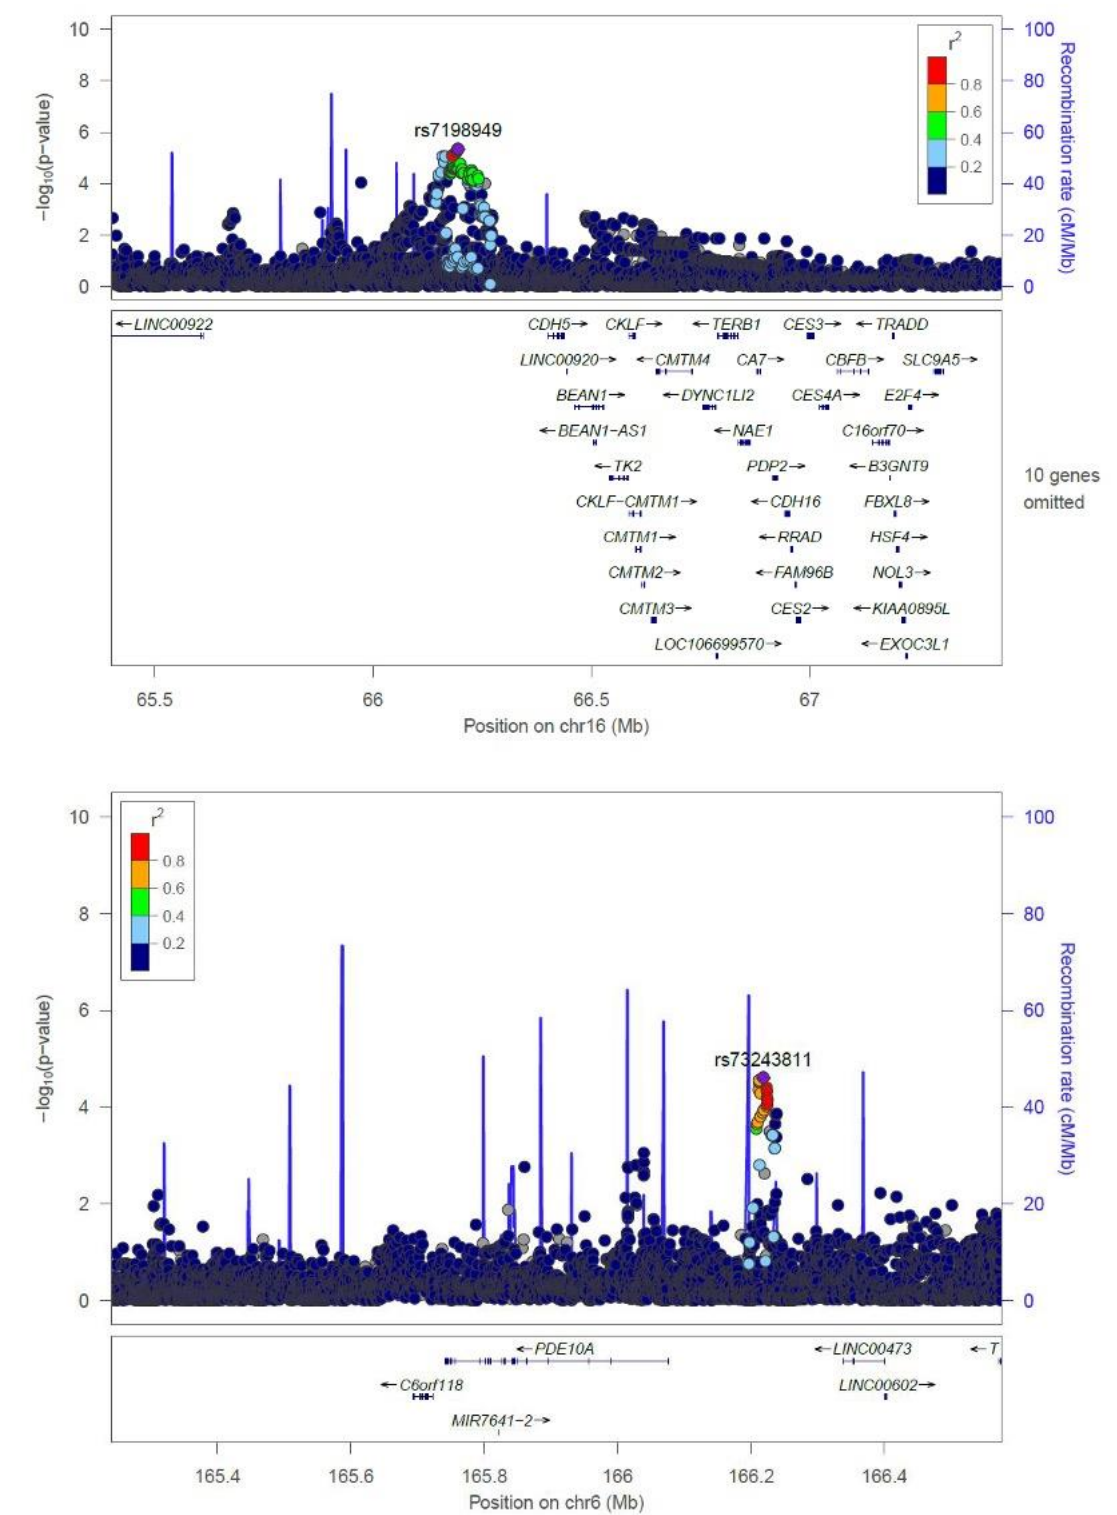

Supplement: s1 [file s1]
