# Supplementary material for: Genome-Wide Association Study Adjusted for Occupational and Environmental Factors for Bladder Cancer Susceptibility
Source: MDPI journal article supplement (doi:10.3390/genes13030448), 2022-02-28
Supplement: s1 [file s1]

Supplementary Table S1: SNPs susceptible to bladder cancer.

| Variant and Risk Allele | <i>p</i> -Value       | RAF  | OR   | CI          | Mapped Gene       | Location     |
|-------------------------|-----------------------|------|------|-------------|-------------------|--------------|
| rs9642880- T            | 7 × 10 <sup>-12</sup> | 0.44 | 1.21 | 1.15-1.28   | CASC11            | 8:127705823  |
| rs798766- T             | 1 × 10 <sup>-11</sup> | 0.19 | 1.24 | 1.17-1.32   | TACC3             | 4:1732512    |
| rs710521- A             | 6 × 10 <sup>-8</sup>  | 0.73 | 1.19 | 1.12-1.27   | P3H2, TP63        | 3:189928144  |
| rs2294008- T            | 2 × 10 <sup>-10</sup> | 0.46 | 1.15 | 1.10-1.20   | JRK, PSCA         | 8:142680513  |
| rs710521- A             | 1 × 10 <sup>-7</sup>  | 0.73 | 1.19 | 1.12-1.27   | P3H2, TP63        | 3:189928144  |
| rs9642880- T            | 9 × 10 <sup>-12</sup> | 0.45 | 1.22 | 1.15-1.29   | CASC11            | 8:127705823  |
| rs710521- A             | 2 × 10 <sup>-10</sup> | 0.73 | 1.18 | 1.12-1.24   | P3H2, TP63        | 3:189928144  |
| rs1495741- ?            | 4 × 10 <sup>-11</sup> | 0.80 | 1.15 | 1.10-1.20   | NAT2              | 8:18415371   |
| rs11892031- ?           | 1 × 10 <sup>-7</sup>  | 0.92 | 1.19 | 1.12-1.27   | UGT1A8, UGT1A10   | 2:233656637  |
| rs8102137- C            | 2 × 10 <sup>-11</sup> | 0.33 | 1.13 | 1.09-1.17   | CCNE1, C19orf12   | 19:29805946  |
| rs9642880- T            | 2 × 10 <sup>-18</sup> | 0.45 | 1.21 | 1.16-1.27   | CASC11            | 8:127705823  |
| rs798766- T             | 4 × 10 <sup>-13</sup> | 0.19 | 1.20 | 1.14-1.26   | TACC3             | 4:1732512    |
| rs1014971- ?            | 8 × 10 <sup>-12</sup> | 0.62 | 1.18 | 1.10-1.18   | APOBEC3A, CBX6    | 22:38936618  |
| rs2294008- T            | 4 × 10 <sup>-11</sup> | 0.46 | 1.13 | 1.09-1.17   | JRK, PSCA         | 8:142680513  |
| rs401681- C             | 5 × 10 <sup>-7</sup>  | 0.54 | 1.11 | 1.07-1.16   | CLPTM1L           | 5:1321972    |
| GSTM1Del- ?             | 5 × 10 <sup>-31</sup> | 0.51 | 1.47 | 1.38-1.57   | -                 |              |
| rs10094872- T           | 2 × 10 <sup>-7</sup>  | 0.41 | 1.26 | -           | CASC11            | 8:127707639  |
| rs62185668- A           | 2 × 10 <sup>-11</sup> | 0.24 | 1.19 | 1.13-1.26   | FAT1P1, LINC02871 | 20:10981287  |
| rs1711973- ?            | 3 × 10 <sup>-6</sup>  | NR   | -    | -           | FOXF2             | 6:1402302    |
| rs2969540- ?            | 2 × 10 <sup>-6</sup>  | NR   | -    | -           | RN7SKP280, HTR5A  | 7:155109147  |
| rs3752645- ?            | 6 × 10 <sup>-6</sup>  | NR   | -    | -           | PRKAR2B           | 7:107142238  |
| rs12216499- ?           | 1 × 10 <sup>-6</sup>  | NR   | -    | -           | RSPH3, RNU6-293P  | 6:158947492  |
| rs1258767- ?            | 7 × 10 <sup>-7</sup>  | NR   | -    | -           | FMN1              | 15:32834253  |
| rs17674580- T           | 8 × 10 <sup>-11</sup> | 0.33 | 1.17 | 1.11-1.22   | SLC14A1           | 18:45729946  |
| rs7238033- ?            | 9 × 10 <sup>-9</sup>  | -    | 1.20 | 1.13-1.28   | SLC14A1           | 18:45737001  |
| rs11543198- G           | 4 × 10 <sup>-9</sup>  | 0.78 | 1.41 | 1.26-1.59   | CLK3              | 15:74619987  |
| rs6104690- A            | 7 × 10 <sup>-7</sup>  | 0.56 | 1.12 | 1.08-1.18   | LINC02871         | 20:11007451  |
| rs907611- A             | 4 × 10 <sup>-8</sup>  | 0.31 | 1.15 | 1.09-1.21   | LSP1              | 11:1852842   |
| rs10936599- C           | 5 × 10 <sup>-9</sup>  | 0.76 | 1.18 | 1.11-1.23   | MYNN              | 3:169774313  |
| rs7747724- ?            | 1 × 10 <sup>-6</sup>  | NR   | 1.11 | 1.06-1.16   | CDKAL1            | 6:20751084   |
| rs4510656- C            | 7 × 10 <sup>-7</sup>  | 0.55 | 1.12 | 1.08-1.18   | CDKAL1            | 6:20766466   |
| rs5003154- ?            | 1 × 10 <sup>-6</sup>  | NR   | 1.11 | 1.06-1.16   | PAG1              | 8:81074718   |
| rs4907479- ?            | 3 × 10 <sup>-6</sup>  | NR   | 1.13 | 1.07-1.18   | MCF2L             | 13:113004794 |
| rs11892031- A           | 1 × 10 <sup>-7</sup>  | 0.92 | 1.17 | 1.11-1.25   | UGT1A8, UGT1A10   | 2:233656637  |
| rs710521- A             | 2 × 10 <sup>-11</sup> | 0.73 | 1.14 | 1.10-1.19   | P3H2, TP63        | 3:189928144  |
| rs798766- T             | 7 × 10 <sup>-25</sup> | 0.19 | 1.22 | 1.18-1.27   | TACC3             | 4:1732512    |
| rs401681- C             | 4 × 10 <sup>-11</sup> | 0.54 | 1.12 | 1.08-1.16   | CLPTM1L           | 5:1321972    |
| rs1495741- A            | 2 × 10 <sup>-10</sup> | 0.80 | 1.14 | 1.09-1.18   | NAT2              | 8:18415371   |
| rs2294008- T            | 3 × 10 <sup>-15</sup> | 0.46 | 1.13 | 1.10-1.16   | AK6P2             | 12:38045401  |
| rs9642880- T            | 4 × 10 <sup>-38</sup> | 0.45 | 1.24 | 1.20-1.28   | CASC11            | 8:127705823  |
| rs10775480- T           | 6 × 10 <sup>-8</sup>  | 0.43 | 1.13 | 1.08-1.19   | SLC14A1           | 18:45737317  |
| rs8102137- C            | 1 × 10 <sup>-11</sup> | 0.33 | 1.13 | 1.09-1.17   | CCNE1, C19orf12   | 19:29805946  |
| rs1014971- T            | 1 × 10 <sup>-11</sup> | 0.62 | 1.13 | 1.09-1.17   | APOBEC3A, CBX6    | 22:38936618  |
| rs2042329- T            | 5 × 10 <sup>-11</sup> | 0.10 | 1.40 | 1.27-1.55   | CWC27             | 5:64771925   |
| rs35356162- T           | 4 × 10 <sup>-7</sup>  | 0.00 | 4.33 | 2.463-7.619 | UHRF1BP1          | 6:34834333   |
| rs3736001- A            | 5 × 10 <sup>-6</sup>  | 0.10 | 1.27 | -           | PSCA, JRK         | 8:142681389  |
| rs111249728- C          | 3 × 10 <sup>-7</sup>  | NR   | 2.68 | NR          | IFNL3P1, SYCN     | 19:39230325  |
| rs111812445- A          | 5 × 10 <sup>-7</sup>  | 0.02 | 1.82 | NR          | LINC01173         | 2:234754157  |
| rs76088467- G           | 2 × 10 <sup>-8</sup>  | 0.02 | 1.56 | NR          | CASC15            | 6:21795556   |
| rs10094872- T           | 3 × 10 <sup>-11</sup> | NR   | 1.23 | NR          | CASC11            | 8:127707639  |

|                |                       |      |      |    |               |             |
|----------------|-----------------------|------|------|----|---------------|-------------|
| rs56297045- A  | 2 x 10 <sup>-7</sup>  | NR   | 1.23 | NR | APOBEC3A      | 22:38954679 |
| rs2736103- C   | 3 x 10 <sup>-7</sup>  | NR   | 1.21 | NR | TERT, MIR4457 | 5:1300286   |
| rs2920281- T   | 2 x 10 <sup>-8</sup>  | NR   | 1.19 | NR | PSCA, JRK     | 8:142679026 |
| rs13063162- A  | 5 x 10 <sup>-7</sup>  | NR   | 1.16 | NR | P3H2, TP63    | 3:189902464 |
| rs10777753- A  | 7 x 10 <sup>-8</sup>  | 0.40 | 1.18 | NR | CCDC38        | 12:95928824 |
| rs11724531- A  | 8 x 10 <sup>-12</sup> | NR   | 1.28 | NR | TACC3, FGFR3  | 4:1751697   |
| rs180940944- ? | 3 x 10 <sup>-9</sup>  | NR   | -    |    | NBEA          | 13:35375956 |

---

modified from GWAS Catalog on Aug 31, 2021.
