# Supplementary material for: Genome-Wide Association Study Adjusted for Occupational and Environmental Factors for Bladder Cancer Susceptibility
Source: MDPI journal article supplement (doi:10.3390/genes13030448), 2022-02-28
Supplement: s1 [file s1]

Supplementary Table S6: We selected SNPs to be used for SNP imputation. The number of SNPs loaded on the chip was 659,184, and the number genotyped was 657,060. In addition, there were 641,043 SNPs with a definite chromosomal location, 395,708 SNPs with a call rate of 99% or higher, a p-value of 0.0001 for the Hardy-Weinberg law of equilibrium, and a minor allele frequency (MAF) of 1% or higher. SNP imputation was performed using 395,708 SNPs.

| Assessment                             |                          | Number of SNPs |          |
|----------------------------------------|--------------------------|----------------|----------|
| ALL                                    |                          | 659,184        |          |
| Typing SNP                             |                          | 657,060        |          |
|                                        |                          | Extracted      | Excluded |
| Mapping SNP                            |                          | 641,043        | 16,017   |
| SNPQC                                  |                          |                |          |
|                                        | Call Rate $\geq$ 99%     | 566,144        | 74,899   |
|                                        | HWE p-value $\geq$ 0.001 | 565,007        | 1,137    |
|                                        | MAF $\geq$ 0.01          | 395,708        | 169,299  |
|                                        | Total                    |                | 261,352  |
| Number of selected SNPs for imputation |                          | 395,708        |          |
