# Supplementary material for: Genome-Wide Association Study Adjusted for Occupational and Environmental Factors for Bladder Cancer Susceptibility
Source: MDPI journal article supplement (doi:10.3390/genes13030448), 2022-02-28
Supplement: s1 [file s1]

Supplementary Table S5: For 789 genotyped samples of 830 samples, 21 samples were excluded in which the sample call rate was  $<0.99$ , the proportion IBD was  $>0.1875$ , and outliers from Japanese clusters identified by principal component analysis. In our study, we used 766 samples in GWAS.

| Assessment                     |                         |         |         |
|--------------------------------|-------------------------|---------|---------|
|                                | Total                   | 830     |         |
|                                | Successful experiment   | 789     |         |
|                                |                         | Extract | Exclude |
|                                | Call Rate $\geq 95\%$   | 787     | 2       |
|                                | estimate IBD $< 0.1875$ |         | 14 pair |
|                                | population structure    |         | 8       |
| Number of excluded samples     |                         |         | 21      |
| Number of samples for analysis |                         | 766     |         |
