# Supplementary material for: Genome-Wide Association Study Adjusted for Occupational and Environmental Factors for Bladder Cancer Susceptibility
Source: MDPI journal article supplement (doi:10.3390/genes13030448), 2022-02-28

Supplemental Figure S1: Results of a principle component analysis (A) Our samples and East Asian samples in IGSR. (B) Our samples and Chinese and Japanese samples in IGSR. The number of outliers from Japanese clusters was 8 and these samples were excluded.

(A) With East Asian samples

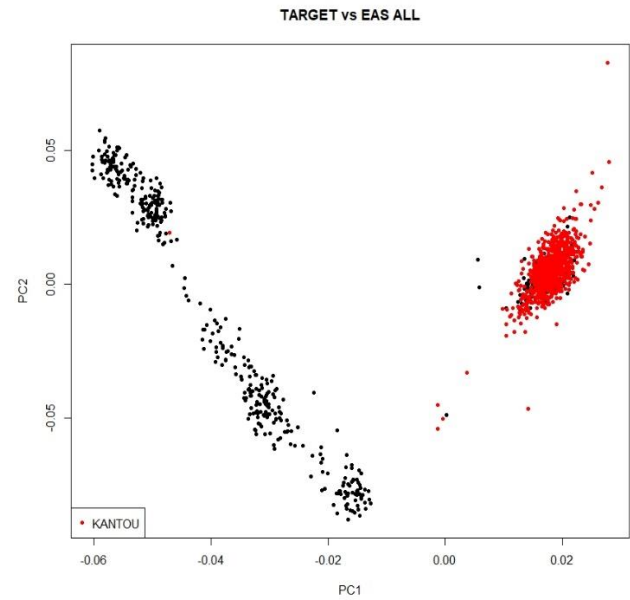

(B) With Chinese and Japanese samples

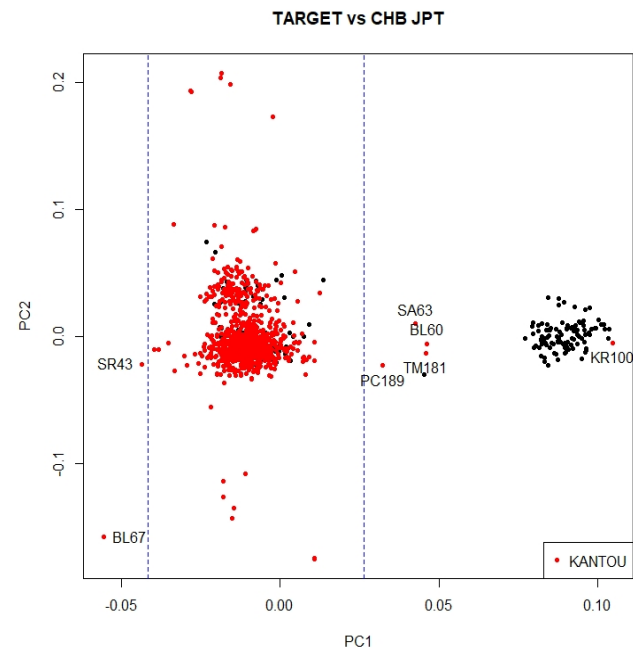

Supplement: s1 [file s1]
