# Supplementary material for: Genome-Wide Association Study Adjusted for Occupational and Environmental Factors for Bladder Cancer Susceptibility
Source: MDPI journal article supplement (doi:10.3390/genes13030448), 2022-02-28
Supplement: s1 [file s1]

Supplementary Table S2: Japan Standard Industrial Classification (Rev. 13, October 2013),

Divisions

| Division                                                      |
|---------------------------------------------------------------|
| A Agriculture and Forestry                                    |
| B Fisheries                                                   |
| C Mining and Quarrying Of Stone and Gravel                    |
| D Construction                                                |
| E Manufacturing                                               |
| F Electricity, Gas, Heat Supply and Water                     |
| G Information and Communications                              |
| H Transport and Postal Services                               |
| I Wholesale and Retail Trade                                  |
| J Finance and Insurance                                       |
| K Real Estate and Goods Rental and Leasing                    |
| L Scientific Research, Professional and Technical Services    |
| M Accommodation, Eating and Drinking Services                 |
| N Living-Related and Personal Services and Amusement Services |
| O Education, Learning Support                                 |
| P Medical, Health Care and Welfare                            |
| Q Compound Services                                           |
| R Services, N.E.C.                                            |
| S Government, Except Elsewhere Classified                     |
| T Industries Unable to Classify                               |
